# Supplementary material for: Subcloning and characterization of highly metastatic cells derived from human esophageal squamous cell carcinoma KYSE150 cells by in vivo selection
Source: PubMed Central journal article supplement (PMC5471001; doi:10.18632/oncotarget.16668), 2017-03-29
Supplement: oncotarget-08-34670-s001.pdf [file oncotarget-08-34670-s001.pdf]

## Subcloning and characterization of highly metastatic cells derived from human esophageal squamous cell carcinoma KYSE150 cells by *in vivo* selection

### Supplementary Materials

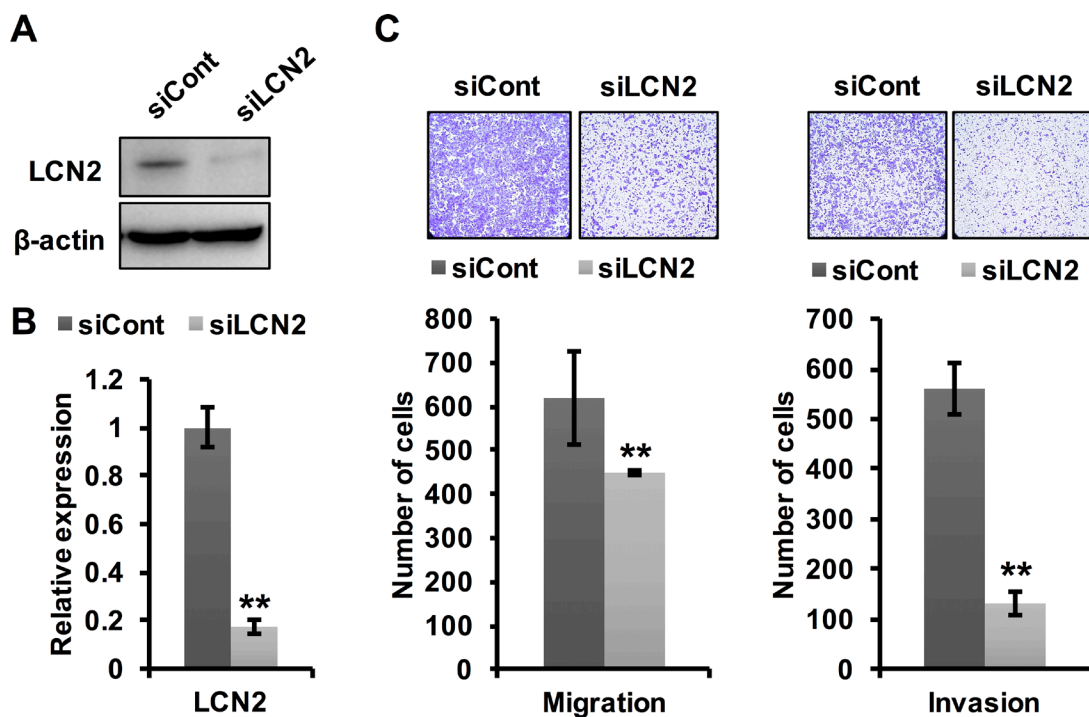

**Supplementary Figure 1: siRNA-mediated knockdown of LCN2.** (A) LCN2 protein expression in the whole cell lysate by western blotting in LuM cells which transfected siCont (siRNA control) or siLCN2 (siRNA for LCN2). (B) LCN2 secretion levels of the supernatant from siRNA transfected LuM cells by ELISA. Data are represented as mean  $\pm$  standard deviations.  $**p < 0.01$ . (C) Cell migration and invasion was assessed by a transwell migration and invasion assay with siRNA transfected LuM cells. Data are represented as mean  $\pm$  standard deviations.  $**p < 0.01$ .

**Supplementary Table 1: Sequence of primers for qRT-PCR**

| <b>Name</b>                    | <b>Forward primer (5' to 3')</b> | <b>Reverse primer (5' to 3')</b> |
|--------------------------------|----------------------------------|----------------------------------|
| <i>SAA-1</i>                   | ATTGTGTACCCTCTCCCC               | CTGCAGAAGTGATCAGCA               |
| <i>SAA-2</i>                   | ATTATATGCATTATCTCAGC             | AGCCCATGTTGTAGCAAACC             |
| <i>CARD16</i>                  | TTCCATGGGTGAAGGTACAA             | AGCTTGATTCTGCCTTCTGG             |
| <i>CASP1</i>                   | TGCCTGTTCCCTGTGATGTGG            | TGTCCTGGGAAGAGGTAGAAACATC        |
| <i>CXCL1</i>                   | AACCGAAGTCATAGCCACAC             | GTTGGATTTGTCACTGTTTCAGC          |
| <i>IL-8</i>                    | AGGTGCAGTTTTTGCCAAGGA            | TTTCTGTGTTGGCGCAGTGT             |
| <i>TNF</i>                     | AGCCCATGTTGTAGCAAACC             | TGAGGTACAGGCCCTCTGAT             |
| <i>CXCL2</i>                   | TGCAGGGAATTCACCTCAAG             | TGAGACAAGCTTTCTGCCCA             |
| <i>IL-6</i>                    | GAGGCACTGGCAGAAAAAA              | TGGCATTGTGGTTGGGTCA              |
| <i>IL-1<math>\alpha</math></i> | ATCCTGAATGACGCCCTCAA             | TGGATGGGCAACTGATGTGA             |
| <i>IL-1<math>\beta</math></i>  | GGACAAGCTGAGGAAGATGC             | TCGTTATCCCATGTGTCGAA             |
| <i>BMP2</i>                    | ATGGATTTCGTGGTGGGAAGTG           | GTGGAGTTCAGATGATCAGC             |
| <i>CXCL3</i>                   | GGAGCACCAACTGACAGGAG             | TAAGGGCAGGGACCACC                |

**Supplementary Table 2: List of the 246 genes which up-regulated by more than 3-fold in LuM cells compared with parent KYSE150 cells. See Supplementary\_Table\_2**
